# Supplementary material for: Ethnobotanical Survey of Local Flora Used for Medicinal Purposes among Indigenous People in Five Areas in Lagos State, Nigeria
Source: MDPI journal article supplement (doi:10.3390/plants11050633), 2022-02-25
Supplement: s1 [file s1]

**Table S1.** Inventory, taxonomical profiles and life-form for plants used for managing diverse health conditions/diseases in five (5) selected locations in Lagos State of Nigeria.

| S/N | Botanical name                                             | Family         | Local name (Yoruba)   | Voucher number | Part(s) used     | Life-form        |
|-----|------------------------------------------------------------|----------------|-----------------------|----------------|------------------|------------------|
| 1   | <i>Abrus precatorius</i> L.                                | Fabaceae       | Ominsinmisin          | 103251         | Leaf, Stem       | Climbers         |
| 2   | <i>Acalypha fimbriata</i> Schumach. & Thonn.               | Euphorbiaceae  | Jinwini               | 103252         | Leaf, Stem       | Herb             |
| 3   | <i>Acanthospermum hispidum</i> DC.                         | Asteraceae     | Dagunro               | 103253         | Leaf, Root       | Herb             |
| 4   | <i>Achyranthes aspera</i> L.                               | Amaranthaceae  | Areyinkosun Aboro     | 103254         | Leaf, Stem       | Herb             |
| 5   | <i>Adenia lobata</i> (Jacq.) Engl.                         | Passifloraceae | Kurere                | 103255         | Stem             | Climbing shrub   |
| 6   | <i>Ageratum conyzoides</i> (L.) L.                         | Asteraceae     | Imi esu, Rerinkomi    | 103256         | Leaf             | Herb             |
| 7   | <i>Albizia ferruginea</i> (Guill. & Perr.) Benth.          | Fabaceae       | Ayunre                | 103257         | Stem, Root       | Tree             |
| 8   | <i>Albizia lebbek</i> (L.) Benth.                          | Fabaceae       | Ayunre, Igbabgo       | 103258         | Root             | Tree             |
| 9   | <i>Albizia zygia</i> (DC.) J.F.Macbr.                      | Fabaceae       | Ayunre were           | 103259         | Leaf             | Tree             |
| 10  | <i>Alchornea cordifolia</i> (Schumach. & Thonn.) Müll.Arg. | Euphorbiaceae  | Ipa, ewe ifa          | 103260         | Leaf, Stem, Root | Shrub/Small tree |
| 11  | <i>Alchornea laxiflora</i> (Benth.) Pax & K.Hoffm.         | Euphorbiaceae  | Ijan                  | 103261         | Root             | Shrub/Small tree |
| 12  | <i>Alternanthera sessilis</i> (L.) R.Br. ex DC.            | Amaranthaceae  | Rekureku              | 103262         | Leaf, Root       | Herb             |
| 13  | <i>Amaranthus spinosus</i> L.                              | Amaranthaceae  | Tete elegun, teteegun | 103263         | Stem             | Herb             |
| 14  | <i>Amaranthus viridis</i> L.                               | Amaranthaceae  | Tete                  | 103264         | Root             | Herb             |
| 15  | <i>Anacardium occidentale</i> L.                           | Anacardiaceae  | Kaju                  | 103265         | Leaf             | Tree             |

|    |                                                                                                                          |               |                         |        |                  |                  |
|----|--------------------------------------------------------------------------------------------------------------------------|---------------|-------------------------|--------|------------------|------------------|
| 16 | <i>Anchomanes difformis</i> (Blume) Engl.                                                                                | Araceae       | Ogirisako               | 103266 | Stem             | Herb             |
| 17 | <i>Annona senegalensis</i> Pers.                                                                                         | Annonaceae    | Abo                     | 103267 | Leaf             | Shrub/Small tree |
| 18 | <i>Anthocleista djalensis</i> A.Chev.                                                                                    | Gentianaceae  | Sapo                    | 103268 | Stem             | Tree             |
| 19 | <i>Anthocleista vogelii</i> Planch.                                                                                      | Gentianaceae  | Sapo                    | 103269 | Leaf             | Tree             |
| 20 | <i>Artocarpus communis</i> J.R.Forst. & G.Forst.<br>(Synonym: <i>Artocarpus altilis</i> (Parkinson ex F.A.Zorn) Fosberg) | Moraceae      | Jaloke                  | 103270 | Leaf             | Tree             |
| 21 | <i>Aspilia africana</i> (Pers.) C.D.Adams                                                                                | Asteraceae    | Yunyun                  | 103271 | Leaf, Stem, Root | Herb             |
| 22 | <i>Asystasia gangetica</i> (L.) T.Anderson                                                                               | Acanthaceae   | Lobiri                  | 103272 | Leaf, Stem       | Creeping herb    |
| 23 | <i>Azadirachta indica</i> A.Juss.                                                                                        | Meliaceae     | Eke-oyibo, Dogoyaro     | 103273 | Stem             | Tree             |
| 24 | <i>Baphia nitida</i> Lodd.                                                                                               | Fabaceae      | Irosun                  | 103274 | Leaf             | Shrub            |
| 25 | <i>Barleria opaca</i> (Vahl) Nees                                                                                        | Acanthaceae   | Apado, Arenikosun       | 103275 | Root             | Shrub            |
| 26 | <i>Bidens pilosa</i> L.                                                                                                  | Asteraceae    | Abere-oloko             | 103276 | Root             | Herb             |
| 27 | <i>Boerhavia diffusa</i> L.                                                                                              | Nyctaginaceae | Etiponola               | 103277 | Stem             | Herb             |
| 28 | <i>Borreria scabra</i> (Schumach. & Thonn.) K.Schum.<br>(Synonym: <i>Spermacoce ruelliae</i> DC.)                        | Rubiaceae     | Awede                   | 103278 | Stem, Root       | Herb             |
| 29 | <i>Borreria verticillata</i> (L.) G.Mey. (Synonym: <i>Spermacoce verticillata</i> L.)                                    | Rubiaceae     | Irawo-ile, Otete, Awede | 103279 | Leaf             | Herb             |
| 30 | <i>Bridelia ferruginea</i> Benth.                                                                                        | Euphorbiaceae | Ira                     | 103280 | Stem, Root       | Shrub            |

|    |                                                                          |                |                |        |                  |                          |
|----|--------------------------------------------------------------------------|----------------|----------------|--------|------------------|--------------------------|
| 31 | <i>Bryophyllum pinnatum</i> (Lam.) Oken                                  | Crassulaceae   | Abamoda        | 103281 | Stem, Root       | Herb                     |
| 32 | <i>Caladium bicolor</i> (Aiton) Vent.                                    | Araceae        | Eje-jesu       | 103282 | Stem, Root       | Herb                     |
| 33 | <i>Calophyllum inophyllum</i> L.                                         | Calophyllaceae |                | 103283 | Leaf             | Tree                     |
| 34 | <i>Calopogonium mucunoides</i> Desv.                                     | Fabaceae       | Werepe ibile   | 103284 | Leaf, Root       | Creeping herb            |
| 35 | <i>Calotropis procera</i> (Aiton) Dryand.                                | Apocynaceae    | Bomu-bomu      | 103285 | Leaf             | Shrub                    |
| 36 | <i>Canna indica</i> L.                                                   | Cannaceae      | Loborikan, Ido | 103286 | Leaf, Stem       | Herb                     |
| 37 | <i>Canavalia ensiformis</i> (L.) DC.                                     | Fabaceae       | Ponpondo       | 103287 | Leaf             | Climber                  |
| 38 | <i>Carpolobia lutea</i> G.Don                                            | Polygalaceae   | Osunsun        | 103288 | Root             | Shrub/small tree         |
| 39 | <i>Celosia argentea</i> L.                                               | Amaranthaceae  | Soko           | 103289 | Leaf             | <u>Herb</u>              |
| 40 | <i>Centrosema pubescens</i> Benth.                                       | Fabaceae       | Ewa-ahun       | 103290 | Leaf, Root       | Climbing herbaceous vine |
| 41 | <i>Chassalia kolly</i> (Schumach.) Hepper                                | Rubiaceae      | Isepe agbe     | 103291 | Leaf             | Shrub                    |
| 42 | <i>Chromolaena odorata</i> (L.) R.M.King & H.Rob.                        | Asteraceae     | Akintola       | 103292 | Leaf, Stem, Root | Shrub                    |
| 43 | <i>Cissampelos owariensis</i> P.Beauv. ex DC.                            | Menispermaceae | Jenjoko        | 103293 | Leaf             | Climber                  |
| 44 | <i>Citrus aurantiifolia</i> (Christm.) Swingle                           | Rutaceae       | Gaingain       | 103294 | Leaf             | Tree                     |
| 45 | <i>Cleistopholis patens</i> (Benth.) Engl. & Diels                       | Annonaceae     | Apako, Orila   | 103295 | Stem             | Tree                     |
| 46 | <i>Cleome fruticosa</i> L. (Synonym: <i>Cadaba fruticosa</i> (L.) Druce) | Capparaceae    | Ekuya          | 103296 | Leaf, Root       | Shrub                    |

|    |                                                                                |               |                            |        |            |                  |
|----|--------------------------------------------------------------------------------|---------------|----------------------------|--------|------------|------------------|
| 47 | <i>Clerodendrum capitatum</i> (Willd.) Schumach & Thonn.                       | Lamiaceae     | Agbosa, Feregede           | 103297 | Leaf, Root | Shrub            |
| 48 | <i>Clerodendrum paniculatum</i> L.                                             | Lamiaceae     | Isedun                     | 103298 | Stem       | Shrub            |
| 49 | <i>Clerodendrum umbellatum</i> Poir.                                           | Lamiaceae     | Isedun                     | 103299 | Leaf       | Shrub            |
| 50 | <i>Clerodendrum volubile</i> P.Beauv.                                          | Lamiaceae     | Marugbosanyan, Marugbo     | 103300 | Leaf       | Climbing shrub   |
| 51 | <i>Cnestis ferruginea</i> Vahl ex DC.                                          | Connaraceae   | Omu aja, Gboyín-Gboyín     | 103301 | Leaf, Stem | Climbing shrub   |
| 52 | <i>Cola millenii</i> K.Schum.                                                  | Malvaceae     | Obi-edun                   | 103302 | Root       | Shrub/Tree       |
| 53 | <i>Colocasia esculenta</i> (L.) Schott                                         | Araceae       | Isu- koko                  | 103251 | Leaf       | Herb             |
| 54 | <i>Commelina africana</i> L.                                                   | Commelinaceae | Gbagodo, Aikujegure        | 103303 | Leaf       | Climber          |
| 55 | <i>Commelina erecta</i> L.                                                     | Commelinaceae | Ìlẹkẹ̀ ọ̀pọ̀lọ́            | 103304 | Stem       | Herb             |
| 56 | <i>Costus afer</i> Ker Gawl.                                                   | Costaceae     | Ireke Omode, Tete-eegungun | 103305 | Root, Stem | Rhizomatous herb |
| 57 | <i>Croton lobatus</i> L. (Synonym: <i>Astraea lobata</i> (L.) Klotzsch).       | Euphorbiaceae | Eru                        | 103306 | Root       | Forb/Herb        |
| 58 | <i>Croton zambesicus</i> Mull.Arg. (Synonym: <i>Croton gratissimus</i> Burch.) | Euphorbiaceae | Aje-obale, Aje-kofole      | 103307 | Leaf, Root | Shrub            |
| 59 | <i>Cucumeropsis mannii</i> Naudin                                              | Cucurbitaceae | Egusi Itoo                 | 103308 | Root       | Creeper          |
| 60 | <i>Cyathula prostrata</i> (L.) Blume                                           | Amaranthaceae | Sawerepepe                 | 103309 | Leaf       | Herb             |
| 61 | <i>Cymbopogon citratus</i> (DC.) Stapf                                         | Poaceae       | Ewe tea, Waapa             | 103310 | Leaf, Root | Herb             |
| 62 | <i>Cyperus haspans</i> L.                                                      | Cyperaceae    | Ayaa-ayaa (Hausa)          | 103311 | Stem       | Sedge            |

|    |                                                                                                     |                 |                                   |        |                  |                |
|----|-----------------------------------------------------------------------------------------------------|-----------------|-----------------------------------|--------|------------------|----------------|
| 63 | <i>Dalbergia saxatilis</i> Hook.f.                                                                  | Fabaceae        | Ogundu, Ojiji                     | 103312 | Root             | Climbing shrub |
| 64 | <i>Datura metel</i> L.                                                                              | Solanaceae      | Apikan, Ewe alujannu              | 103313 | Leaf             | Shrub          |
| 65 | <i>Desmodium velutinum</i> (Willd.) DC.                                                             | Fabaceae        | Ewe oku                           | 103314 | Leaf             | Shrub          |
| 66 | <i>Dichrostachys cinerea</i> (L.) Wight & Arn.                                                      | Fabaceae        | Kara, Ajagboluti                  | 103315 | Leaf             | Tree           |
| 67 | <i>Dissotis rotundifolia</i> (Sm.) Triana (Synonym: <i>Heterotis rotundifolia</i> (Sm.) Jacq.-Fél.) | Melastomataceae | Awede, Ajagunmorasin, Ogede apara | 103316 | Leaf             | Shrub          |
| 68 | <i>Eclipta prostrata</i> (L.) L.                                                                    | Asteraceae      | Arojoku                           | 103317 | Leaf, Root       | Herb           |
| 69 | <i>Elaeis guineensis</i> Jacq.                                                                      | Arecaceae       | Ope                               | 103318 | Stem, Root       | Tree           |
| 70 | <i>Eleusine indica</i> (L.) Gaertn.                                                                 | Poaceae         | Gbegi                             | 103319 | Stem, Root       | Herb           |
| 71 | <i>Eleutheranthera ruderalis</i> (Swartz) Sch.-Bip.                                                 | Asteraceae      | Aworo-ona                         | 103320 | Leaf             | Herb           |
| 72 | <i>Emilia coccinea</i> (Sims) G.Don                                                                 | Asteraceae      | Odundun owo                       | 103321 | Leaf, Stem, Root | Herb           |
| 73 | <i>Entandrophragma angolense</i> (Welw.) C.DC.                                                      | Meliaceae       | Jebo                              | 103322 | Stem-bark, Leaf  | Tree           |
| 74 | <i>Eragrostis namaquensis</i> Nees ex Schrad. (Synonym: <i>Eragrostis japonica</i> (Thunb.) Trin.)  | Poaceae         | Agbado esin                       | 103323 | Stem             | Herb           |
| 75 | <i>Erigeron floribundus</i> (Kunth) Sch.Bip.                                                        | Asteraceae      | Bìbìmbèlémó                       | 103324 | Leaf             | Herb           |
| 76 | <i>Erythrina senegalensis</i> DC.                                                                   | Fabaceae        | Ologbosere                        | 103325 | Root             | Shrub/Tree     |
| 77 | <i>Euphorbia glaucophylla</i> Poir. (Synonym: <i>Euphorbia trinervia</i> Schumach. & Thonn.)        | Euphorbiaceae   | Emile                             | 103326 | Leaf, Stem       | Herb           |
| 78 | <i>Euphorbia heterophylla</i> L.                                                                    | Euphorbiaceae   | Egele                             | 103327 | Stem             | Herb           |

|    |                                                                                                                |               |                              |        |                     |                      |
|----|----------------------------------------------------------------------------------------------------------------|---------------|------------------------------|--------|---------------------|----------------------|
| 79 | <i>Ficus benjamina</i> L.                                                                                      | Moraceae      | Odan                         | 103328 | Leaf, Stem-<br>bark | Tree                 |
| 80 | <i>Ficus capensis</i> Thunb. (Synonym: <i>Ficus sur</i> Forssk.)                                               | Moraceae      | Opoto                        | 103329 | Stem, Leaf          | Tree                 |
| 81 | <i>Ficus exasperata</i> Vahl                                                                                   | Moraceae      | Epin                         | 103330 | Leaf                | Shrub                |
| 82 | <i>Ficus polita</i> Vahl                                                                                       | Moraceae      | Odan                         | 103331 | Stem                | Shrub/ small<br>tree |
| 83 | <i>Laportea aestuans</i> (L.) Chew                                                                             | Urticaceae    | Araailomi                    | 103332 | Whole plant         | Herb                 |
| 84 | <i>Gliricidia sepium</i> (Jacq.) Walp.                                                                         | Fabaceae      | Agunmaniye                   | 103333 | Leaf, Stem          | Small tree           |
| 85 | <i>Glyphaea brevis</i> (Spreng.) Monach.                                                                       | Malvaceae     | Atori                        | 103334 | Leaf                | Tree                 |
| 86 | <i>Gomphrena celosioides</i> Mart.                                                                             | Amaranthaceae | Ipopo ale, ajikewu           | 103335 | Leaf, Stem          | Herb                 |
| 87 | <i>Grewia pubescens</i> P.Beauv.                                                                               | Malvaceae     | Oraigbo                      | 103336 | Leaf                | Shrub                |
| 88 | <i>Harungana madagascariensis</i> Lam. ex Poir.                                                                | Hypericaceae  | Amuje                        | 103337 | Leaf, Stem          | Tree                 |
| 89 | <i>Heliotropium indicum</i> L.                                                                                 | Boraginaceae  | Ogbe akuko                   | 103338 | Leaf                | Herb                 |
| 90 | <i>Hibiscus rosa-sinensis</i> L.                                                                               | Malvaceae     | Isapa                        | 103339 | Leaf                | Shrub                |
| 91 | <i>Hibiscus surattensis</i> L.                                                                                 | Malvaceae     | Ewe – emu, <i>Isapa pupa</i> | 103340 | Stem, Root          | Climber              |
| 92 | <i>Hippocratea pallens</i> Planch. ex Oliv. (Synonym: <i>Apodostigma pallens</i> (Planch. ex Oliv.) R.Wilczek) | Celastraceae  | Oju-ologbo-nla               | 103341 | Leaf                | Climber              |
| 93 | <i>Hoslundia opposita</i> Vahl                                                                                 | Lamiaceae     | Iwaregbo                     | 103342 | Leaf                | Shrub                |
| 94 | <i>Hyptis suaveolens</i> (L.) Poit.                                                                            | Lamiaceae     | Jogbo, Arunfonfon            | 103343 | Leaf, Stem          | Herb                 |
| 95 | <i>Icacina trichantha</i> Oliv.                                                                                | Icacinaceae   | Gbegbe                       | 103344 | Leaf, Stem          | Shrub                |
| 96 | <i>Indigofera arrecta</i> A.Rich.                                                                              | Fabaceae      | Elu-aja                      | 103345 | Leaf                | Herb                 |

|     |                                                                             |                |                                                        |        |                  |                  |
|-----|-----------------------------------------------------------------------------|----------------|--------------------------------------------------------|--------|------------------|------------------|
| 97  | <i>Indigofera hirsuta</i> L.                                                | Fabaceae       | Ejaomode                                               | 103346 | Leaf, Stem       | Herb             |
| 98  | <i>Ipomoea involucrata</i> P.Beauv. (Synonym: <i>Ipomoea pileata</i> Roxb.) | Convolvulaceae | Ododo odo, Elukeresi                                   | 103347 | Leaf, Stem, Root | Herb             |
| 99  | <i>Jatropha curcas</i> L.                                                   | Euphorbiaceae  | Botuje, Lapalapa                                       | 103348 | Leaf             | Shrub/Small tree |
| 100 | <i>Jatropha gossypifolia</i> L.                                             | Euphorbiaceae  | Lapalapa pupa                                          | 103349 | Leaf, Root       | Shrub            |
| 101 | <i>Kigelia africana</i> (Lam.) Benth.                                       | Bignoniaceae   | Pandoro                                                | 103350 | Stem-bark, Root  | Tree             |
| 102 | <i>Lantana camara</i> L.                                                    | Verbenaceae    | Ewon-agogo, efinrin oso                                | 103351 | Leaf, Stem       | Shrub            |
| 103 | <i>Lawsonia inermis</i> L.                                                  | Lythraceae     | Laali                                                  | 103352 | Leaf, Stem       | Shrub            |
| 104 | <i>Leucaena leucocephala</i> (Lam.) de Wit                                  | Fabaceae       | Lusina                                                 | 103353 | Root             | Tree             |
| 105 | <i>Luffa cylindrica</i> (L.) M.Roem.                                        | Cucurbitaceae  | Kankan ayaba, Aya oyinbo                               | 103354 | Leaf, Stem       | Climber          |
| 106 | <i>Macaranga barteri</i> Müll.Arg.                                          | Euphorbiaceae  | Araasa, Awasa                                          | 103355 | Leaf, Stem       | Tree             |
| 107 | <i>Microdesmis puberula</i> Hook.f. ex Planch.                              | Pandaceae      | Ido Apata                                              | 103356 | Leaf             | Shrub            |
| 108 | <i>Mallotus oppositifolius</i> (Geiseler) Müll.Arg.                         | Euphorbiaceae  | Ipa, Eja, Oju-eja, Jeja, Iyadudu, Orokoro              | 103357 | Stem, Root       | Shrub/Tree       |
| 109 | <i>Malvastrum coromandelianum</i> (L.) Garcke                               | Malvaceae      | Asa, Olowonransansan, Sekuseku, Asa orisa, Aborisawaye | 103358 | Stem             | Subshrub         |
| 110 | <i>Mangifera indica</i> L.                                                  | Anacardiaceae  | Mongoro                                                | 103359 | Leaf, Stem-bark  | Tree             |

|     |                                                                                                             |                |                                             |        |            |                |
|-----|-------------------------------------------------------------------------------------------------------------|----------------|---------------------------------------------|--------|------------|----------------|
| 111 | <i>Margaritaria discoidea</i> (Baill.) G.L.Webster                                                          | Phyllanthaceae | Agaga-odan, Awe                             | 103360 | Leaf       | Tree           |
| 112 | <i>Mariscus alternifolius</i> Vahl (Synonym: <i>Cyperus cyperoides</i> (L.) Kuntze)                         | Cyperaceae     | Alubosa eranko, Ikeregún, Samikoko, Efo'aba | 103361 | Leaf, Root | Sedge          |
| 113 | <i>Melanthera scandens</i> (Schumach. & Thonn.) Roberty                                                     | Asteraceae     | Abo yúnyún, Agbugbo                         | 103362 | Leaf, Stem | Climber        |
| 114 | <i>Merremia pterygocaulos</i> (Choisy) Hallier f.                                                           | Convolvulaceae | Atewegbore                                  | 103363 | Leaf       | Climber        |
| 115 | <i>Mezoneuron benthamianum</i> Baill. (Synonym: <i>Caesalpinia benthamiana</i> (Baill.) Herend. & Zarucchi) | Fabaceae       | Aseta, Jenifinrani, amuranju                | 103364 | Leaf       | Climbing shrub |
| 116 | <i>Mimosa pudica</i> L.                                                                                     | Fabaceae       | Padimo, patanmo                             | 103365 | Leaf, Stem | Creeper        |
| 117 | <i>Morinda lucida</i> Benth.                                                                                | Rubiaceae      | Oruwo                                       | 103366 | Stem       | Tree           |
| 118 | <i>Moringa oleifera</i> Lam.                                                                                | Moringaceae    | Ewe igbale                                  | 103367 | Stem       | Tree           |
| 119 | <i>Myrianthus arboreus</i> P.Beauv.                                                                         | Urticaceae     | Obisere, Eweade, Ibishere, Eweure           | 103368 | Leaf       | Shrub/Tree     |
| 120 | <i>Nauclea latifolia</i> Sm. (Synonym: <i>Sarcocephalus latifolius</i> (Sm.) E.A.Bruce)                     | Rubiaceae      | Egbesi                                      | 103369 | Leaf       | Tree           |
| 121 | <i>Newbouldia laevis</i> (P.Beauv.) Seem.                                                                   | Bignoniaceae   | Akoko                                       | 103370 | Leaf       | Shrub/Tree     |
| 122 | <i>Ocimum gratissimum</i> L.                                                                                | Lamiaceae      | Efinrin                                     | 103371 | Leaf, Root | Herb           |
| 123 | <i>Panicum scandens</i> (Schrad. ex Schult.) Trin. (Synonym: <i>Setaria scandens</i> Schrad.)               | Poaceae        | Eeran esin                                  | 103372 | Leaf       | Herb           |
| 124 | <i>Passiflora foetida</i> L.                                                                                | Passifloraceae | Nine-nine                                   | 103373 | Leaf, Stem | Creeping vine  |
| 125 | <i>Paullinia pinnata</i> L.                                                                                 | Sapindaceae    | Kakansela                                   | 103374 | Leaf       | Climber        |
| 126 | <i>Perotis indica</i> (L.) Kuntze                                                                           | Poaceae        | Perotis                                     | 103375 | Leaf       | Herb           |

|     |                                                                                                                 |                |                                             |        |                  |                       |
|-----|-----------------------------------------------------------------------------------------------------------------|----------------|---------------------------------------------|--------|------------------|-----------------------|
| 127 | <i>Persea americana</i> Mill.                                                                                   | Lauraceae      | Pia, apoka                                  | 103376 | Leaf             | Tree                  |
| 128 | <i>Phaulopsis falcisepala</i> C.B.Clarke (Synonym: <i>Phaulopsis ciliata</i> (Willd.) Hepper)                   | Acanthaceae    | Atapara, Ata-igbó, Apa ọgbé                 | 103377 | Leaf             | Herb                  |
| 129 | <i>Phyllanthus amarus</i> Schumach. & Thonn.                                                                    | Phyllanthaceae | Eyin olobe                                  | 103378 | Leaf, Stem, Root | Herb                  |
| 130 | <i>Phyllanthus niruri</i> L.                                                                                    | Phyllanthaceae | Eyin olobe                                  | 103379 | Leaf, Root       | Herb                  |
| 131 | <i>Physalis angulata</i> L.                                                                                     | Solanaceae     | Koropo                                      | 103380 | Root             | Herb                  |
| 132 | <i>Piliostigma thonningii</i> (Schum.) Milne-Redh. (Synonym: <i>Bauhinia thonningii</i> Schum.)                 | Fabaceae       | Abafe                                       | 103381 | Stem-bark        | Tree                  |
| 133 | <i>Pinus caribaea</i> Morelet                                                                                   | Pinaceae       | Pine                                        | 103382 | Leaf             | Tree                  |
| 134 | <i>Pleioceras barteri</i> Baill.                                                                                | Apocynaceae    | Dagba, Abeji, Abeko                         | 103383 | Leaf, Root       | Climbing shrub, Liana |
| 135 | <i>Polyalthia suaveolens</i> Engl. & Diels (Synonym: <i>Greenwayodendron suaveolens</i> (Engl. & Diels) Verdc.) | Annonaceae     | Agudugbu, Ooro                              | 103384 | Stem             | Tree                  |
| 136 | <i>Portulaca oleracea</i> L.                                                                                    | Portulacaceae  | Semolapa                                    | 103385 | Leaf             | Herb                  |
| 137 | <i>Psidium guajava</i> L.                                                                                       | Myrtaceae      | Girofa                                      | 103386 | Leaf             | Tree                  |
| 138 | <i>Rauvolfia vomitoria</i> Afzel.                                                                               | Apocynaceae    | Asofeyeje                                   | 103387 | Leaf, Root       | Tree                  |
| 139 | <i>Ricinus communis</i> L.                                                                                      | Euphorbiaceae  | Ewe –laa                                    | 103388 | Leaf             | Shrub                 |
| 140 | <i>Scoparia dulcis</i> L.                                                                                       | Plantaginaceae | Olorunyinni, ojuologbo Ominsinminsin Gogoro | 103389 | Leaf             | Herb                  |

|     |                                                                                                             |                |                                                      |        |                     |                      |
|-----|-------------------------------------------------------------------------------------------------------------|----------------|------------------------------------------------------|--------|---------------------|----------------------|
| 141 | <i>Secamone afzelii</i> (Roem. & Schult.) K.Schum.                                                          | Asclepiadaceae | Ailu, Arilu, Òlógbõn<br>gbürú                        | 103390 | Leaf                | Shrub                |
| 142 | <i>Securinega virosa</i> (Roxb. ex Willd.) Baill. (Synonym: <i>Flueggea virosa</i> (Roxb. ex Willd.) Royle) | Phyllanthaceae | Iranje, Awewe                                        | 103391 | Stem, Root          | Shrub                |
| 143 | <i>Senna hirsuta</i> (L.) H.S.Irwin & Barneby                                                               | Fabaceae       | Rere, Arunfofo                                       | 103392 | Leaf, Root          | Shrub                |
| 144 | <i>Senna obtusifolia</i> (L.) H.S.Irwin & Barneby                                                           | Fabaceae       | Ako-rere, Epa ikun                                   | 103393 | Leaf                | Herb                 |
| 145 | <i>Senna podocarpa</i> (Guill. & Perrottet) Lock                                                            | Fabaceae       | Asuwon ibile, Aja-rere                               | 103394 | Leaf                | Shrub                |
| 146 | <i>Senna siamea</i> (Lamarck) H.S.Irwin & Barneby                                                           | Fabaceae       | Ayagba                                               | 103395 | Root, Stem-<br>bark | Tree                 |
| 147 | <i>Senna tora</i> (L.) Roxb.                                                                                | Fabaceae       | Epa-ikun, Ewe morin,<br>Epaja-abo, <i>Aidan toro</i> | 103396 | Stem, Root          | Herb                 |
| 148 | <i>Sesamum indicum</i> L.                                                                                   | Pedaliaceae    | Ekuku gogoro                                         | 103397 | Root                | Herb                 |
| 149 | <i>Sesamum radiatum</i> Schumach. & Thonn.                                                                  | Pedaliaceae    | Ekuku Gogoro                                         | 103398 | Root                | Herb                 |
| 150 | <i>Sida acuta</i> Burm.f.                                                                                   | Malvaceae      | Osekutu, isepotu, gbegi                              | 103399 | Leaf                | Shrub                |
| 151 | <i>Sida cordifolia</i> L.                                                                                   | Malvaceae      | Iso-obo, Isekutu                                     | 103400 | Leaf, Stem          | Undershrub           |
| 152 | <i>Sida linifolia</i> Juss. ex Cav.                                                                         | Malvaceae      | Osekutu                                              | 103401 | Stem                | Subshrub             |
| 153 | <i>Smilax kraussiana</i> Meisn. (Synonym: <i>Smilax anceps</i> Willd.)                                      | Smilacaceae    | Ekanamagbo                                           | 103402 | Root                | Climbing shrub       |
| 154 | <i>Solanum nigrum</i> L. (Synonym: <i>Solanum americanum</i> Mill.)                                         | Solanaceae     | Igba, odu                                            | 103403 | Stem                | Herb                 |
| 155 | <i>Solanum torvum</i> Sw.                                                                                   | Solanaceae     | Ewe Igbalode, Igbalode<br>legun                      | 103404 | Root                | Shrub/ Small<br>tree |

|     |                                                                                                                         |                |                              |        |                  |         |
|-----|-------------------------------------------------------------------------------------------------------------------------|----------------|------------------------------|--------|------------------|---------|
| 156 | <i>Solenostemon monostachyus</i> (P.Beauv.) Briq.<br>(Synonym: <i>Plectranthus monostachyus</i> (P.Beauv.) B.J.Pollard) | Lamiaceae      | Olojongbodu, Aranpolo        | 103405 | Leaf, Stem       | Herb    |
| 157 | <i>Sorghum bicolor</i> (L.) Moench                                                                                      | Poaceae        | Okababa                      | 103406 | Stem             | Herb    |
| 158 | <i>Sphenocentrum jollyanum</i> Pierre                                                                                   | Menispermaceae | Akerejupoo                   | 103407 | Seed, Root       | Shrub   |
| 159 | <i>Spigelia anthelmia</i> L.                                                                                            | Loganiaceae    | Aparan                       | 103408 | Leaf, Stem       | Herb    |
| 160 | <i>Spondias mombin</i> L.                                                                                               | Anacardiaceae  | Iyeye                        | 103409 | Leaf, Stem, Root | Tree    |
| 161 | <i>Sporobolus indicus</i> (L.) R.Br.                                                                                    | Poaceae        | Motisan                      | 103410 | Leaf, Stem       | Herb    |
| 162 | <i>Stachytarpheta indica</i> (L.) Vahl                                                                                  | Verbenaceae    | Iru eku, Iru alangba, Akisan | 103411 | Leaf, Root       | Shrub   |
| 163 | <i>Sterculia tragacantha</i> Lindl.                                                                                     | Malvaceae      | Alawefon, Okagbo             | 103412 | Root             | Tree    |
| 164 | <i>Synedrella nodiflora</i> (L.) Gaertn.                                                                                | Asteraceae     | Ako-yun-yun, Aworo-ona       | 103413 | Leaf, Root       | Herb    |
| 165 | <i>Syzygium guineense</i> (Willd.) DC.                                                                                  | Myrtaceae      | Adere, Igi aro               | 103414 | Leaf             | Tree    |
| 166 | <i>Talinum triangulare</i> (Jacq.) Willd. (Synonym: <i>Talinum fruticosum</i> (L.) Juss.)                               | Talinaceae     | Gure                         | 103415 | Leaf, Root       | Herb    |
| 167 | <i>Tapinanthus globiferus</i> (A.Rich.) Tiegh.                                                                          | Loranthaceae   | Afomo                        | 103416 | Root             | Shrub   |
| 168 | <i>Telfairia occidentalis</i> Hook.f.                                                                                   | Cucurbitaceae  | Eweroko, Ugwu                | 103417 | Leaf             | Climber |
| 169 | <i>Terminalia ivorensis</i> A.Chev.                                                                                     | Combretaceae   | Afara                        | 103418 | Leaf             | Tree    |
| 170 | <i>Tetracera alnifolia</i> Willd.                                                                                       | Dilleniaceae   | Opon                         | 103419 | Leaf             | Climber |
| 171 | <i>Thaumatococcus daniellii</i> (Benn.) Benth.                                                                          | Marantaceae    | Ewe iran                     | 103420 | Leaf             | Herb    |

|     |                                                                                       |               |                                                                 |        |                     |       |
|-----|---------------------------------------------------------------------------------------|---------------|-----------------------------------------------------------------|--------|---------------------|-------|
| 172 | <i>Thevetia peruviana</i> (Pers.) K.Schum.                                            | Apocynaceae   | Kanminko                                                        | 103421 | Leaf, Root          | Tree  |
| 173 | <i>Tithonia diversifolia</i> (Hemsl.) A.Gray                                          | Asteraceae    | Agbale, Sepeleba                                                | 103422 | Root                | Shrub |
| 174 | <i>Trichilia monadelpha</i> (Thonn.) J.J.de Wilde                                     | Meliaceae     | Ajanrere, Ako rere                                              | 103423 | Leaf                | Tree  |
| 175 | <i>Tridax procumbens</i> (L.) L.                                                      | Asteraceae    | Igbalode, sábarú má                                             | 103424 | Leaf, Root          | Herb  |
| 176 | <i>Triumfetta cordifolia</i> A.Rich.                                                  | Malvaceae     | Yogboro, Akee-eri                                               | 103425 | Leaf, Stem          | Shrub |
| 177 | <i>Urena lobata</i> L. var. <i>glauca</i> (Blume) Borss. Waalk.                       | Malvaceae     | Okeriri                                                         | 103426 | Leaf                | Shrub |
| 178 | <i>Urena lobata</i> L.                                                                | Malvaceae     | Oju oro, Okeriri, Ilasa<br>agborin, Ilasa<br>omode, Ilasa oyibo | 103427 | Leaf, Stem          | Shrub |
| 179 | <i>Vernonia amygdalina</i> Delile                                                     | Asteraceae    | Ewuro                                                           | 103428 | Leaf, Stem          | Shrub |
| 180 | <i>Vernonia cinerea</i> (L.) Less. (Synonym: <i>Cyanthillium cinereum</i> (L.) H.Rob. | Asteraceae    | Amunimuye, Bojure                                               | 103429 | Leaf, Stem,<br>Root | Herb  |
| 181 | <i>Vitex doniana</i> Sweet                                                            | Lamiaceae     | Oori                                                            | 103430 | Root                | Tree  |
| 182 | <i>Waltheria indica</i> L.                                                            | Malvaceae     | Korikodi, Ewe epo                                               | 103431 | Leaf                | Shrub |
| 183 | <i>Zingiber officinale</i> Roscoe                                                     | Zingiberaceae | Atale                                                           | 103432 | Root                | Herb  |

**Table S2.** Folkloric uses of the identified plants and the number of participants from each location. LGA = local government area

| S/N                                | Plant                                                                  | Imota<br>(Epe LGA)                          | Ijebu<br>(Epe LGA)            | Alimosho<br>LGA              | Badagry LGA                | Eti-Osa LGA       |
|------------------------------------|------------------------------------------------------------------------|---------------------------------------------|-------------------------------|------------------------------|----------------------------|-------------------|
| Health conditions/diseases treated |                                                                        |                                             |                               |                              |                            |                   |
| 1                                  | <i>Abrus precatorius</i>                                               | Stomach ache (15)                           | Cough (18)                    | Nil                          | Nil                        | Cough (20)        |
| 2                                  | <i>Acalypha fimbriata</i>                                              | Nil                                         | Nil                           | Cough (12)                   | Divinity (19)              | Nil               |
| 3                                  | <i>Acanthospermum hispidum</i>                                         | Nil                                         | Hypertension (17)             | Nil                          | Divinity(10)               | Hypertension (18) |
| 4                                  | <i>Achyranthes aspera</i>                                              | Erection (20)                               | Sight (15)                    | Potency (17)                 | Nil                        | Sight (19)        |
| 5                                  | <i>Adenia lobata</i>                                                   | Pile (16)                                   | Arthritis (18)                | Nil                          | Nil                        | Arthritis (14)    |
| 6                                  | <i>Ageratum conyzoides</i>                                             | Infectious disease (17)                     | Malaria (20)                  | Hypertension (16)            | Sight (13)                 | Malaria (14)      |
| 7                                  | <i>Albizia ferruginea</i>                                              | Cough (12)                                  | Pregnancy (14)                | Nil                          | Nil                        | Nil               |
| 8                                  | <i>Albizia lebbek</i>                                                  | Nil                                         | Fever (12),<br>Arthritis (8)  | Arthritis (18)               | Cough (19)                 | Nil               |
| 9                                  | <i>Albizia zygia</i>                                                   | Aphrodisiac (7),<br>Arthritis (13)          | Cough (17),<br>Toothache (3)  | Cough (9),<br>Arthritis (11) | Arthritis (17)             | Nil               |
| 10                                 | <i>Alchornea cordifolia</i>                                            | Sight (12),<br>Arthritis (8)                | Ulcers (13),<br>Arthritis (7) | Malaria (16),<br>Sight (4)   | Sight (12),<br>Malaria (6) | Sight (5)         |
| 11                                 | <i>Alchornea laxiflora</i>                                             | De-worming (14),<br>Infectious diseases (6) | Malaria (20)                  | Nil                          | Oral hygiene (17)          | Nil               |
| 12                                 | <i>Alternanthera sessilis</i>                                          | Nil                                         | Nil                           | Sight (11)                   | Jaundice (6)               | Nil               |
| 13                                 | <i>Amaranthus spinosus</i>                                             | Nil                                         | Nil                           | Sight (9)                    | Cirrhosis (12)             | Nil               |
| 14                                 | <i>Amaranthus viridis</i>                                              | Nil                                         | Nil                           | Longevity (13)               | Nil                        | Nil               |
| 15                                 | <i>Anacardium occidentale</i>                                          | Nil                                         | Malaria (20)                  | Nil                          | Nil                        | Malaria (18)      |
| 16                                 | <i>Anchomanes difformis</i>                                            | Chicken pox (8),<br>measles (12)            | Nil                           | Nil                          | Nil                        | Nil               |
| 17                                 | <i>Annona senegalensis</i>                                             | Malaria (16)                                | Nil                           | Nil                          | Potency (14)               | Nil               |
| 18                                 | <i>Anthocleista djalensis</i>                                          | Nil                                         | Hypertension (15)             | Nil                          | Nil                        | Hypertension (11) |
| 19                                 | <i>Anthocleista vogelii</i>                                            | Nil                                         | Nil                           | Nil                          | Divinity (7)               | Nil               |
| 20                                 | <i>Artocarpus communis</i><br>(Synonym:<br><i>Artocarpus altilis</i> ) | Nil                                         | Nil                           | Nil                          | Malaria (20)               | Nil               |
| 21                                 | <i>Aspilia africana</i>                                                | Fibroid (13)                                | Cough (17)                    | Nil                          | Purgative (9)              | Cough (11)        |
| 22                                 | <i>Asystasia gangetica</i>                                             | Neck pain (8)                               | Sight (13)                    | Potency (10)                 | Cough (18)                 | Sight (15)        |
| 23                                 | <i>Azadirachta indica</i>                                              | Nil                                         | Nil                           | Nil                          | Anti-snake bite (16)       | Nil               |
| 24                                 | <i>Baphia nitida</i>                                                   | Divinity (12)                               | Nil                           | Nil                          | Nil                        | Nil               |

|    |                                                                                         |                    |                           |                              |                       |                          |
|----|-----------------------------------------------------------------------------------------|--------------------|---------------------------|------------------------------|-----------------------|--------------------------|
| 25 | <i>Barleria opaca</i>                                                                   | Nill               | Nill                      | Diabetes (17)                | Nill                  | Nill                     |
| 26 | <i>Bidens pilosa</i>                                                                    | Nill               | Nill                      | Cough (19)                   | Nill                  | Nill                     |
| 27 | <i>Boerhavia diffusa</i>                                                                | Nill               | Nill                      | Malaria (18)                 | Nill                  | Nill                     |
| 28 | <i>Borreria scabra</i><br>(Synonym:<br><i>Spermacoce</i><br><i>ruelliae</i> )           | Ringworm (14)      | Diabetes (16)             | Eczema (16)                  | Birth control (17)    | Diabetes (10)            |
| 29 | <i>Borreria verticillata</i><br>(Synonym:<br><i>Spermacoce</i><br><i>verticillata</i> ) | Ringworm (18)      | Ringworm (20)             | Birth control<br>(5)         | Nill                  | Nill                     |
| 30 | <i>Bridelia ferruginea</i>                                                              | Diabetes (16)      | Diabetes (19)             | Nill                         | Birth control (18)    | Nill                     |
| 31 | <i>Bryophyllum</i><br><i>pinnatum</i>                                                   | Nill               | Cough (20)                | Sight (15)                   | Nill                  | Cough (19)               |
| 32 | <i>Caladium bicolor</i>                                                                 | Nill               | Pimples (17)              | Cough (18)                   | Nill                  | Pimples (12)             |
| 33 | <i>Calophyllum</i><br><i>inophyllum</i>                                                 | Nill               | Nill                      | Nill                         | Scurvy (8)            | Nill                     |
| 34 | <i>Calopogonium</i><br><i>mucunoides</i>                                                | Ulcer (14)         | Scurvy (3),<br>Cough (11) | Cough (19)                   | Nill                  | Scurvy (8),<br>Cough (9) |
| 35 | <i>Calotropis procera</i>                                                               | Nill               | Nill                      | Malaria (15)                 | Nill                  | Conjunctivitis<br>(10)   |
| 36 | <i>Canna indica</i>                                                                     | Nill               | Cirrhosis (11)            | Pimples (14)                 | Nill                  | Cirrhosis (3)            |
| 37 | <i>Canavalia</i><br><i>ensiformis</i>                                                   | Nill               | Pregnancy (4)             | Nill                         | Nill                  | Pregnancy (6)            |
| 38 | <i>Carpolobia lutea</i>                                                                 | Easy delivery (12) | Nill                      | Nill                         | Nill                  | Nill                     |
| 39 | <i>Celosia argentea</i>                                                                 | Nill               | Nill                      | Malaria (2)                  | Nill                  | Nill                     |
| 40 | <i>Centrosema</i><br><i>pubescens</i>                                                   | Nill               | Nill                      | Pimples (6)                  | Purgative (7)         | Nill                     |
| 41 | <i>Chassalia kolly</i>                                                                  | Nill               | Nill                      | Aphrodisiac<br>(12)          | Aphrodisiac (6)       | Nill                     |
| 42 | <i>Chromolaena</i><br><i>odorata</i>                                                    | Malaria (20)       | Nill                      | Potency (4),<br>Malaria (18) | Nill                  | Malaria (20)             |
| 43 | <i>Cissampelos</i><br><i>owariensis</i>                                                 | Miscarriage (20)   | Nill                      | Nill                         | Miscarriage (16)      | Nill                     |
| 44 | <i>Citrus aurantiifolia</i>                                                             | Nill               | Malaria (19)              | Nill                         | Nill                  | Malaria (7)              |
| 45 | <i>Cleistopholis patens</i>                                                             | Nill               | Pimples (13)              | Nill                         | Nill                  | Pimples (10)             |
| 46 | <i>Cleome fruticosa</i><br>( <i>Cadaba fruticosa</i> )                                  | Nill               | Nill                      | Cirrhosis (13)               | Birth control (8)     | Nill                     |
| 47 | <i>Clerodendrum</i><br><i>capitatum</i>                                                 | Malaria (14)       | Nill                      | Nill                         | Diabetes (12)         | Nill                     |
| 48 | <i>Clerodendrum</i><br><i>paniculatum</i>                                               | Nill               | Nill                      | Cirrhosis (6)                | Nill                  | Nill                     |
| 49 | <i>Clerodendrum</i><br><i>umbellatum</i>                                                | Nill               | Nill                      | Stomach ache<br>(16)         | Nill                  | Nill                     |
| 50 | <i>Clerodendrum</i><br><i>volubile</i>                                                  | Nill               | Nill                      | Nill                         | Immune booster<br>(2) | Nill                     |

|    |                                                                   |                   |                         |                     |                     |                         |
|----|-------------------------------------------------------------------|-------------------|-------------------------|---------------------|---------------------|-------------------------|
| 51 | <i>Cnestis ferruginea</i>                                         | Nill              | Immune booster (4)      | Nill                | Nill                | Immune booster (1)      |
| 52 | <i>Cola millenii</i>                                              | Miscarriage (9)   | Nill                    | Nill                | Nill                | Nill                    |
| 53 | <i>Colocasias esculenta</i>                                       | Nill              | Nill                    | Cough (14)          | Nill                | Nill                    |
| 54 | <i>Commelina africana</i>                                         | Curse (3)         | Nill                    | Nill                | Diabetes (11)       | Nill                    |
| 55 | <i>Commelina erecta</i>                                           | Nill              | Nill                    | Potency (15)        | Nill                | Nill                    |
| 56 | <i>Costus afer</i>                                                | Ulcer (16)        | Cough (19)<br>Ulcer (1) | Cough (18)          | Ulcer (5)           | Ulcer (10)<br>Cough (8) |
| 57 | <i>Croton lobatus</i><br>( <i>Astraea lobata</i> )                | Nill              | Nill                    | Nill                | Cough (18)          | Nill                    |
| 58 | <i>Croton zambesicus</i><br>( <i>Croton gratissimus</i> )         | Nill              | Nill                    | Hypertension (10)   | Malaria (13)        | Nill                    |
| 59 | <i>Cucumeropsis mannii</i>                                        | Nill              | Nill                    | Cough (1)           | Nill                | Nill                    |
| 60 | <i>Cyathula prostrata</i>                                         | Nill              | Nill                    | Nill                | Pimples (3)         | Nill                    |
| 61 | <i>Cymbopogon citratus</i>                                        | Nill              | Nill                    | Longevity (9)       | Nill                | Nill                    |
| 62 | <i>Cyperus haspans</i>                                            | Nill              | Nill                    | Arthritis (11)      | Nill                | Nill                    |
| 63 | <i>Dalbergia saxatilis</i>                                        | Longevity (14)    | Nill                    | Nill                | Nill                | Nill                    |
| 64 | <i>Datura metel</i>                                               | Hypertension (14) | Nill                    | Immune booster (11) | Muscle relaxant (4) | Nill                    |
| 65 | <i>Desmodium velutinum</i>                                        | Erection (1)      | Nill                    | Nill                | Nill                | Nill                    |
| 66 | <i>Dichrostachys cinerea</i>                                      | Headache (10)     | Toothache (12)          | Nill                | Cough (15)          | Nill                    |
| 67 | <i>Dissotis rotundifolia</i><br>( <i>Heterotis rotundifolia</i> ) | Easy delivery (6) | Pregnancy care (11)     | Nill                | Nill                | Pregnancy care (12)     |
| 68 | <i>Eclipta prostrata</i><br>( <i>Heterotis rotundifolia</i> )     | Nill              | Nill                    | Cough (16)          | Nill                | Nill                    |
| 69 | <i>Elaeis guineensis</i>                                          | Nill              | Nill                    | Nill                | Blood tonic (3)     | Nill                    |
| 70 | <i>Eleusine indica</i>                                            | Pile (9)          | Cough (7)               | Nill                | Malaria (17)        | Cough (13)              |
| 71 | <i>Eleutheranthera ruderalis</i>                                  | Nill              | Nill                    | Pile (16)           | Longevity (10)      | Nill                    |
| 72 | <i>Emilia coccinea</i>                                            | Nill              | Foot pains (14)         | Birth control (3)   | Purgative (12)      | Foot pains (8)          |
| 73 | <i>Entandrophragma angolense</i>                                  | Pile (15)         | Nill                    | Nill                | Nill                | Nill                    |
| 74 | <i>Eragrostis namaquensis</i><br>( <i>Eragrostis japonica</i> )   | Nill              | Stomach ache (7)        | Nill                | Nill                | Stomach ache (3)        |
| 75 | <i>Erigeron floribundus</i>                                       | Nill              | Nill                    | Scurvy (9)          | Nill                | Nill                    |

|     |                                                                 |                           |                                        |                          |                   |                                       |
|-----|-----------------------------------------------------------------|---------------------------|----------------------------------------|--------------------------|-------------------|---------------------------------------|
| 76  | <i>Erythrina senegalensis</i>                                   | Nill                      | Nill                                   | Nill                     | Diabetes (13)     | Nill                                  |
| 77  | <i>Euphorbia glaucophylla</i><br>( <i>Euphorbia trinervia</i> ) | Nill                      | Longevity (17)                         | Malaria (11)             | Cough (15)        | Longevity (6)                         |
| 78  | <i>Euphorbia heterophylla</i>                                   | Nill                      | Nill                                   | Longevity (1)            | Nill              | Nill                                  |
| 79  | <i>Ficus benjamina</i>                                          | Nill                      | Scurvy (5),<br>Cough (14)              | Scurvy (1),<br>Cough (7) | Nill              | Scurvy (4),<br>Cough (2)              |
| 80  | <i>Ficus capensis</i><br>( <i>Ficus sur</i> )                   | Nill                      | Hypertension<br>(7),<br>Cough (18)     | Nill                     | Nill              | Hypertension<br>(5), Cough (15)       |
| 81  | <i>Ficus exasperata</i>                                         | Scurvy (9),<br>Cough (12) | Hypertension<br>(10)                   | Scurvy (8)               | Scurvy (5)        | Nill                                  |
| 82  | <i>Ficus polita</i>                                             | Nill                      | Nill                                   | Nill                     | Pimples (6)       | Nill                                  |
| 83  | <i>Fleurya aestuans</i>                                         | Nill                      | Nill                                   | Cough (18)               | Nill              | Nill                                  |
| 84  | <i>Gliricidia sepium</i>                                        | Nill                      | Nill                                   | Arthritis (12)           | Hypertension (14) | Nill                                  |
| 85  | <i>Glyphaea brevis</i>                                          | Ulcer (13)                | Nill                                   | Nill                     | Nill              | Nill                                  |
| 86  | <i>Gomphrena celosioides</i>                                    | Nill                      | Pimples (10)                           | Nill                     | Potency (14)      | Pimples (13)                          |
| 87  | <i>Grewia pubescens</i>                                         | Nill                      | Nill                                   | Nill                     | Hypertension (16) | Nill                                  |
| 88  | <i>Harungana madagascariensis</i>                               | Anti-snake bite<br>(11)   | Anti-snake<br>bite (6)                 | Nill                     | Nill              | Anti-snake<br>bite (1)                |
| 89  | <i>Heliotropium indicum</i>                                     | Erection (9)              | Nill                                   | Nill                     | Pile (18)         | Nill                                  |
| 90  | <i>Hibiscus rosa-sinensis</i>                                   | Nill                      | Nill                                   | Cough (10)               | Nill              | Nill                                  |
| 91  | <i>Hibiscus surattensis</i>                                     | Nill                      | Diabetes (15)                          | Nill                     | Potency (12)      | Diabetes (8)                          |
| 92  | <i>Hippocratea pallens</i><br>( <i>Apodostigma pallens</i> )    | Malaria (17)              | Nill                                   | Nill                     | Nill              | Nill                                  |
| 93  | <i>Hoslundia opposita</i>                                       | Ulcer (19)                | Nill                                   | Nill                     | Nill              | Nill                                  |
| 94  | <i>Hyptis suaveolens</i>                                        | Nill                      | Anti-snake<br>bite (15)                | Nill                     | Nill              | Anti-snake<br>bite (7)                |
| 95  | <i>Icacina trichantha</i>                                       | Curse (14)                | Potency (15)                           | Potency (10)             | Potency (17)      | Potency (11)                          |
| 96  | <i>Indigofera arrecta</i>                                       | Nill                      | Nill                                   | Pile (11)                | Pregnancy (7)     | Nill                                  |
| 97  | <i>Indigofera hirsuta</i>                                       | Sight (9)                 | Stomach ache<br>(16)                   | Sight (5)                | Purgative (19)    | Stomach ache<br>(12)                  |
| 98  | <i>Ipomoea involucrata</i><br>( <i>Ipomoea pileata</i> )        | Nill                      | Anti-snake<br>bite (13),<br>Cough (17) | Malaria (16)             | Cough (20)        | Anti-snake<br>bite (3), Cough<br>(12) |
| 99  | <i>Jatropha curcas</i>                                          | Pile (12)                 | Nill                                   | Pile (19)                | Sight (9)         | Pile (15)                             |
| 100 | <i>Jatropha gossypifolia</i>                                    | Nill                      | Piles (20)                             | Nill                     | Nill              | Piles (20)                            |
| 101 | <i>Kigelia africana</i>                                         | Cough (13)                | Nill                                   | Nill                     | Pile (15)         | Nill                                  |

|     |                                                                      |                         |                               |                                      |                           |                           |
|-----|----------------------------------------------------------------------|-------------------------|-------------------------------|--------------------------------------|---------------------------|---------------------------|
| 102 | <i>Lantana camara</i>                                                | Nill                    | Nill                          | Purgative (7),<br>Nervousness<br>(1) | Potency (6)               | Nill                      |
| 103 | <i>Lawsonia inermis</i>                                              | Nill                    | Malaria (18)                  | Gonorrhoea<br>(10)                   | Nill                      | Malaria (16)              |
| 104 | <i>Leucaena<br/>leucocephala</i>                                     | Nill                    | Nill                          | Purgative (6)                        | Nill                      | Nill                      |
| 105 | <i>Luffa cylindrica</i>                                              | Cramps (7)              | Fever (15)                    | Purgative<br>(19)                    | Convulsion(9)             | Nill                      |
| 106 | <i>Macaranga barteri</i>                                             | Easy delivery (14)      | Anti-snake<br>bite (15)       | Nill                                 | Nill                      | Anti-snake<br>bite (4)    |
| 107 | <i>Microdesmis<br/>puberula</i>                                      | Easy delivery (11)      | Nill                          | Nill                                 | Nill                      | Nill                      |
| 108 | <i>Mallotus<br/>oppositifolius</i>                                   | Stomach problem<br>(16) | Nill                          | Malaria (10)                         | Sight (5)                 | Nill                      |
| 109 | <i>Malvastrum<br/>coromandelianum</i>                                | Nill                    | Nill                          | Anti-snake<br>bite (2)               | Nill                      | Nill                      |
| 110 | <i>Mangifera indica</i>                                              | Malaria (19)            | Malaria (16)                  | Malaria (19)                         | Malaria (11)<br>Fever (8) | Fever (14)<br>Malaria (8) |
| 111 | <i>Margaritaria<br/>discoidea</i>                                    | Nill                    | Malaria (13)                  | Nill                                 | Nill                      | Malaria (10)              |
| 112 | <i>Mariscus<br/>alternifolius<br/>(Cyperus<br/>cyperoides)</i>       | Nill                    | Nill                          | Jaundice (3)                         | Arthritis (6)             | Nill                      |
| 113 | <i>Melanthra<br/>scandens</i>                                        | Curse (9)               | Nill                          | Nill                                 | Malaria (15)              | Nill                      |
| 114 | <i>Merremia<br/>pterygocaulos</i>                                    | Nill                    | Foot pain (11)                | Sight (4)                            | Nill                      | Foot pain (5)             |
| 115 | <i>Mezoneuron<br/>benthamianum<br/>(Caesalpinia<br/>benthamiana)</i> | Piles (11)              | Nill                          | Nill                                 | Pile (14)                 | Nill                      |
| 116 | <i>Mimosa pudica</i>                                                 | Nill                    | Erection (14)                 | Anti-snake<br>bite (4)               | Nill                      | Erection (7)              |
| 117 | <i>Morinda lucida</i>                                                | Malaria (13)            | Fever (17)                    | Jaundice (9)                         | Malaria (17)              | Malaria (14)              |
| 118 | <i>Moringa oleifera</i>                                              | Nill                    | Cough (17)                    | Nill                                 | Nill                      | Cough (10)                |
| 119 | <i>Myrianthus<br/>arboreus</i>                                       | Neck pain (12)          | Cough (5)                     | Nill                                 | Nill                      | Nill                      |
| 120 | <i>Nauclea latifolia<br/>(Sarcocephalus<br/>latifolius)</i>          | Malaria (16)            | Malaria (17),<br>Pimples (10) | Nill                                 | Diabetes (15)             | Pimples (8)               |
| 121 | <i>Newbouldia laevis</i>                                             | Diabetes (15)           | Measles (17)                  | Worm-<br>expellant (7)               | Jaundice (16)             | Diabetes (12)             |
| 122 | <i>Ocimum<br/>gratissimum</i>                                        | Piles (18)              | Purgative (20)                | Purgative<br>(16)                    | Cough (12)                | Piles (12)                |

|     |                                                                                             |                                |                           |                        |                        |                           |
|-----|---------------------------------------------------------------------------------------------|--------------------------------|---------------------------|------------------------|------------------------|---------------------------|
| 123 | <i>Panicum scandens</i><br>( <i>Setaria scandens</i> )                                      | Nill                           | Malaria (13)              | Nill                   | Nill                   | Malaria (8),              |
| 124 | <i>Passiflora foetida</i>                                                                   | Nill                           | Foot pain (16)            | Nill                   | Sight (6)              | Foot pain (9)             |
| 125 | <i>Paullinia pinnata</i>                                                                    | Pile (11)                      | Aphrodisiac<br>(12)       | Nill                   | Nill                   | Nill                      |
| 126 | <i>Perotis indica</i>                                                                       | Nill                           | Nill                      | Blood tonic<br>(3)     | Nill                   | Nill                      |
| 127 | <i>Persea americana</i>                                                                     | Nill                           | Nill                      | Nill                   | Longevity (14)         | Nill                      |
| 128 | <i>Phaulopsis</i><br><i>falcisepala</i><br>( <i>Phaulopsis ciliata</i> )                    | Malaria (15)                   | Nill                      | Nill                   | Nill                   | Nill                      |
| 129 | <i>Phyllanthus</i><br><i>amarus</i>                                                         | Fever (11)                     | Pregnancy (13)            | Immune<br>booster (8)  | Cough (11)             | Pregnancy (4)             |
| 130 | <i>Phyllanthus niruri</i>                                                                   | Nill                           | Foot pain (6)             | Nill                   | Sight (8)              | Foot pain (5)             |
| 131 | <i>Physalis angulata</i>                                                                    | Skin rashes (20)               | Skin rashes<br>(18)       | Nill                   | Pile (12)              | Nill                      |
| 132 | <i>Piliostigma</i><br><i>thonningii</i><br>( <i>Bauhinia</i><br><i>thonningii</i> )         | Nill                           | Nill                      | Potency (6)            | Nill                   | Nill                      |
| 133 | <i>Pinus caribaea</i>                                                                       | Nill                           | Nill                      | Nill                   | Cough (5)              | Nill                      |
| 134 | <i>Pleioceras barteri</i>                                                                   | Neck pain (7)                  | Nill                      | Stomach ache<br>(11)   | Nill                   | Nill                      |
| 135 | <i>Polyalthia</i><br><i>suaveolens</i><br>( <i>Greenwayodendro</i><br><i>n suaveolens</i> ) | Nill                           | Nill                      | Cough (2)              | Nill                   | Nill                      |
| 136 | <i>Portulaca oleracea</i>                                                                   | Nill                           | Nill                      | Cough (10)             | Anti-snake bite<br>(8) | Nill                      |
| 137 | <i>Psidium guajava</i>                                                                      | Fever (9)                      | Stomach ache<br>(17)      | Nill                   | Nill                   | Stomach ache<br>(14)      |
| 138 | <i>Rauvolfia vomitoria</i>                                                                  | Malaria (10),<br>Insanity (18) | Hypertension<br>(14)      | Muscle<br>relaxant (7) | Cough (10)             | Muscle<br>relaxant (3)    |
| 139 | <i>Ricinus communis</i>                                                                     | Nill                           | Nill                      | Divinity (13)          | Sight (16)             | Nill                      |
| 140 | <i>Scoparia dulcis</i>                                                                      | Black coated<br>tongue (4)     | Nill                      | Nill                   | Birth control (9)      | Nill                      |
| 141 | <i>Secamone afzelii</i>                                                                     | Nill                           | Immune<br>booster (14)    | Nill                   | Nill                   | Immune<br>booster (12)    |
| 142 | <i>Securinega virosa</i><br>( <i>Flueggea virosa</i> )                                      | Typhoid (10)                   | Typhoid (12)              | Pregnancy<br>(13)      | Immune booster<br>(11) | Nill                      |
| 143 | <i>Senna hirsuta</i>                                                                        | Nill                           | Nill                      | Cough (10)             | Purgative (17)         | Nill                      |
| 144 | <i>Senna obtusifolia</i>                                                                    | Nill                           | Scurvy (9),<br>Cough (13) | Nill                   | Nill                   | Scurvy (7),<br>Cough (12) |
| 145 | <i>Senna podocarpa</i>                                                                      | Stomach Problem<br>(16)        | Nill                      | Nill                   | Nill                   |                           |
| 146 | <i>Senna siamea</i>                                                                         | Nill                           | Nill                      | Nill                   | Immune booster<br>(11) | Nill                      |

|     |                                                                          |                           |                            |                           |              |                                     |
|-----|--------------------------------------------------------------------------|---------------------------|----------------------------|---------------------------|--------------|-------------------------------------|
| 147 | <i>Senna tora</i>                                                        | Nill                      | Potency (11),<br>Sight (5) | Malaria (13)              | Divinity (4) | Potency (1),<br>Sight (2)           |
| 148 | <i>Sesamum indicum</i>                                                   | Nill                      | Nill                       | Nill                      | Potency (2)  | Potency (1)                         |
| 149 | <i>Sesamum radiatum</i>                                                  | Nill                      | Potency (6)                | Nill                      | Nill         | Nill                                |
| 150 | <i>Sida acuta</i> Burm.                                                  | Fibroid (7)               | Sight (6)                  | Sight (3)                 | Nill         | Sight (2)                           |
| 151 | <i>Sida cordifolia</i>                                                   | Nill                      | Cough (8)                  | Nill                      | Nill         | Cough (4)                           |
| 152 | <i>Sida linifolia</i>                                                    | Nill                      | Scurvy (9)                 | Nill                      | Pimples (7)  | Scurvy (1)                          |
| 153 | <i>Smilax kraussiana</i><br>( <i>Smilax anceps</i> )                     | Erection (12)             | Nill                       | Nill                      | Nill         | Nill                                |
| 154 | <i>Solanum nigrum</i><br>( <i>Solanum americanum</i> )                   | Nill                      | Nill                       | Diabetes (15)             | Cough (17)   | Nill                                |
| 155 | <i>Solanum torvum</i>                                                    | Pimples (8)               | Potency (10)               | Hypertension<br>(13)      | Nill         | Potency (5)                         |
| 156 | <i>Solenostemon monostachyus</i><br>( <i>Plectranthus monostachyus</i> ) | Pile (14)                 | Malaria (10)               | Purgative (9)             | Potency (11) | Malaria (8)                         |
| 157 | <i>Sorghum bicolor</i>                                                   | Nill                      | Nill                       | Malaria (7)               | Nill         | Nill                                |
| 158 | <i>Sphenocentrum jollyanum</i>                                           | Deworming (8)             | Malaria (6)                | Deworming<br>(6)          | Fever (11)   | Nill                                |
| 159 | <i>Spigellia anthelmia</i>                                               | Nill                      | Nill                       | Diabetes (10)             | Pile (16)    | Nill                                |
| 160 | <i>Spondias mombin</i>                                                   | Penile erection<br>(14)   | Diabetes (8)               | Anti-snake<br>bite (5)    | Insomnia (6) | Diabetes (2)                        |
| 161 | <i>Sporobolus indicus</i>                                                | Nill                      | Diabetes (10)              | Purgative (9)             | Nill         | Diabetes (4)                        |
| 162 | <i>Stachytarpheta indica</i>                                             | Erection (4)              | Hypertension<br>(9)        | Nill                      | Nill         | Hypertension<br>(7)                 |
| 163 | <i>Sterculia tragacantha</i>                                             | Diabetes (13)             | Nill                       | Nill                      | Nill         | Nill                                |
| 164 | <i>Synedrella nodiflora</i>                                              | Potency (10) Sight<br>(1) | Nill                       | Longevity (5)             | Malaria (2)  | Nill                                |
| 165 | <i>Syzygium guineense</i>                                                | Nill                      | Nill                       | Diabetes (12)             | Nill         | Nill                                |
| 166 | <i>Talinum triangulare</i><br>( <i>Talinum fruticosum</i> )              | Blood tonic (20)          | Blood tonic<br>(18)        | Malaria (6)               | Nill         | Nill                                |
| 167 | <i>Tapinanthus globiferous</i>                                           | Fibroid (11)              | Nill                       | Nill                      | Nill         | Nill                                |
| 168 | <i>Telfairia occidentalis</i>                                            | Blood tonic (19)          | Blood tonic<br>(16)        | Hypertension<br>(9)       | Nill         | Nill                                |
| 169 | <i>Terminalia ivorensis</i>                                              | Divinity (9)              | Nill                       | Nill                      | Nill         | Nill                                |
| 170 | <i>Tetracera alnifolia</i>                                               | Fibroid (5)               | Nill                       | Nill                      | Nill         | Nill                                |
| 171 | <i>Thaumatococcus daniellii</i>                                          | Ulcer (16)                | Ulcer (13)                 | Food<br>sweetener<br>(15) | Ulcer (17)   | Food<br>sweetener (1),<br>Ulcer (3) |

|     |                                                          |                                 |                                 |                   |                   |                  |
|-----|----------------------------------------------------------|---------------------------------|---------------------------------|-------------------|-------------------|------------------|
| 172 | <i>Thevetia peruviana</i>                                | Purgative (14)                  | Purgative (10)                  | Pimples (7)       | Cough (8)         | Nill             |
| 173 | <i>Tithonia diversifolia</i>                             | Malaria (18)                    | Malaria (15)                    | Malaria (11)      | Pile (9)          | Malaria (12)     |
| 174 | <i>Trichilia monadelpha</i>                              | Insomnia (2)                    | Nill                            | Nill              | Nill              | Nill             |
| 175 | <i>Tridax procumbens</i>                                 | Ulcer (8)                       | Foot pains (9)                  | Malaria (7)       | Hypertension (9)  | Foot pains (3)   |
| 176 | <i>Triumfetta cordifolia</i>                             | Easy delivery (9)               | Nill                            | Birth control (5) | Nill              | Nill             |
| 177 | <i>Urena lobata</i> var. <i>glauca</i>                   | Nill                            | Potency (10)                    | Nill              | Nill              | Potency (5)      |
| 178 | <i>Urena lobata</i>                                      | Birth control (11)              | Rheumatism (10)                 | Wound (17)        | Diarrhea (13)     | Stomach ache (8) |
| 179 | <i>Vernonia amygdalina</i>                               | Diabetes (15)                   | Malaria (13)                    | Oral hygiene (17) | Diarrhea (16)     | Malaria (18)     |
| 180 | <i>Vernonia cinerea</i> ( <i>Cyanthillium cinereum</i> ) | Asthma (14)                     | Bronchitis (11)                 | Cold (8)          | Stomachache (11)  | Cold (5)         |
| 181 | <i>Vitex doniana</i>                                     | Dysentery (11)                  | Diarrhea (14)                   | Dysentery (10)    | Hypertension (14) | Indigestion (9)  |
| 182 | <i>Waltheria indica</i>                                  | Wound (13),<br>Blood tonic (19) | Ulcer (16),<br>Blood tonic (12) | Cold (10)         | Cough (18)        | Cough (5)        |
| 183 | <i>Zingiber officinale</i>                               | Ulcer (12),<br>Indigestion (14) | Cough (14),<br>Ulcer (9)        | Indigestion (10)  | Cough (18)        | Flu (10)         |

---

**Table S3.** Data collection sheet for ethnobotanical survey of medicinal plants used for managing various health conditions/diseases in five (5) selected locations in Lagos State of Nigeria

|    | <b>Plant</b> | <b>Disease</b> | <b>Part used</b> (Leaves=0),<br>(Stem=1), (Bark =2),<br>(Seeds=5), (Roots=3),<br>(Flower=4) (Whole plant =6)<br>(Rhizome/bulb=7) | <b>Preparation</b><br>(Maceration = 0);<br>Poultice=1; Decoction<br>2. Enema=3;<br>infusion=4 | <b>Plant form</b><br>(shrub,<br>herbs, trees,<br>climber) | <b>Administration</b><br>(Topical=0), (Orally=1),<br>(Bathing=2), (Enema=3) | <b>Dosage</b> (0=1x/day),<br>(1=1-3x/day), (2=as<br>needed and 3= other | <b>Abundance</b><br>(Common=0),<br>(Rare=1),<br>(Abundant=2) |
|----|--------------|----------------|----------------------------------------------------------------------------------------------------------------------------------|-----------------------------------------------------------------------------------------------|-----------------------------------------------------------|-----------------------------------------------------------------------------|-------------------------------------------------------------------------|--------------------------------------------------------------|
| 1  |              |                |                                                                                                                                  |                                                                                               |                                                           |                                                                             |                                                                         |                                                              |
| 2  |              |                |                                                                                                                                  |                                                                                               |                                                           |                                                                             |                                                                         |                                                              |
| 3  |              |                |                                                                                                                                  |                                                                                               |                                                           |                                                                             |                                                                         |                                                              |
| 4  |              |                |                                                                                                                                  |                                                                                               |                                                           |                                                                             |                                                                         |                                                              |
| 5  |              |                |                                                                                                                                  |                                                                                               |                                                           |                                                                             |                                                                         |                                                              |
| 6  |              |                |                                                                                                                                  |                                                                                               |                                                           |                                                                             |                                                                         |                                                              |
| 7  |              |                |                                                                                                                                  |                                                                                               |                                                           |                                                                             |                                                                         |                                                              |
| 8  |              |                |                                                                                                                                  |                                                                                               |                                                           |                                                                             |                                                                         |                                                              |
| 9  |              |                |                                                                                                                                  |                                                                                               |                                                           |                                                                             |                                                                         |                                                              |
| 10 |              |                |                                                                                                                                  |                                                                                               |                                                           |                                                                             |                                                                         |                                                              |
| 11 |              |                |                                                                                                                                  |                                                                                               |                                                           |                                                                             |                                                                         |                                                              |
| 12 |              |                |                                                                                                                                  |                                                                                               |                                                           |                                                                             |                                                                         |                                                              |
| 13 |              |                |                                                                                                                                  |                                                                                               |                                                           |                                                                             |                                                                         |                                                              |
| 14 |              |                |                                                                                                                                  |                                                                                               |                                                           |                                                                             |                                                                         |                                                              |
| 15 |              |                |                                                                                                                                  |                                                                                               |                                                           |                                                                             |                                                                         |                                                              |
